# Supplementary material
Source: PubMed Central journal article supplement (PMC2964421)
Supplement: NIHMS237126-supplement-Supp1.pdf [file NIHMS237126-supplement-Supp1.pdf]

# Supplementary Appendix

This appendix has been provided by the authors to provide additional information about their research.

This appendix is an on-line supplement to:

Health Status after Treatment for Coronary Artery Disease and Type 2 Diabetes in the BARI 2D Trial

by

Maria Mori Brooks PhD, Sheng-Chia Chung PhD, Tarek Helmy MD, William B. Hillegass MD, Jorge Escobedo MD,  
Kathryn A. Melsop MS, Elaine M. Massaro MS, Robert D. McBane MD, Pamela Hyde RN, Mark A. Hlatky MD  
and the BARI 2D Study Group

Table S1. Comparison of baseline characteristics for patients with and without follow up quality of life data

|                              | Patients with at least one<br>quality of life follow up data<br>n=2163 | Patients without any quality<br>of life follow up data<br>n=205 | p      |
|------------------------------|------------------------------------------------------------------------|-----------------------------------------------------------------|--------|
| Prompt revascularization (%) | 49.0                                                                   | 57.1                                                            | 0.026  |
| Insulin sensitizing (%)      | 49.9                                                                   | 50.2                                                            | 0.93   |
| CABG stratum (%)             | 32.4                                                                   | 30.2                                                            | 0.53   |
| Age (Mean)                   | 62.3                                                                   | 63.7                                                            | 0.039  |
| Male (%)                     | 70.6                                                                   | 67.3                                                            | 0.32   |
| Current Smoking (%)          | 12.2                                                                   | 16.0                                                            | 0.12   |
| BMI (Mean)                   | 31.8                                                                   | 31.4                                                            | 0.45   |
| Prior MI                     | 31.6                                                                   | 36.7                                                            | 0.14   |
| History of Heart Failure (%) | 6.2                                                                    | 11.6                                                            | 0.0036 |
| Angina (%)                   |                                                                        |                                                                 |        |
| None/Angina Equivalent       | 39.7                                                                   | 35.6                                                            | 0.0021 |
| Stable CCS I or II           | 43.0                                                                   | 37.1                                                            |        |
| Stable CCS III or IV         | 17.3                                                                   | 27.2                                                            |        |
| Duration of Diabetes (Mean)  | 10.3                                                                   | 11.6                                                            | 0.089  |
| Insulin Use (%)              | 27.6                                                                   | 31.3                                                            | 0.25   |
| DASI (Mean)                  | 19.1                                                                   | 17.3                                                            | 0.081  |
| Energy (Mean)                | 51.9                                                                   | 44.9                                                            | <0.001 |
| Health Distress (Mean)       | 40.3                                                                   | 42.4                                                            | 0.29   |
| Self-Rated Health (Mean)     | 38.9                                                                   | 35.5                                                            | 0.050  |

Tables S2: Missing data among the 2,163 patients with at least one follow-up health status measure.

Cumulative Number of Deaths and Study Withdrawal among 2163 patients

|        | Death | Study Withdrawal |
|--------|-------|------------------|
| Year 2 | 36    | 13               |
| Year 3 | 83    | 36               |
| Year 4 | 129   | 47               |

Missing Data among Patients who were Alive and Participating in BARI 2D

|          | # of patients in the study | DASI      |      | Energy    |      | Health Distress |      | Self Rated Health |      |
|----------|----------------------------|-----------|------|-----------|------|-----------------|------|-------------------|------|
|          |                            | # Missing | %    | # Missing | %    | # Missing       | %    | # Missing         | %    |
| Baseline | 2,163                      | 6         | 0.28 | 6         | 0.28 | 7               | 0.32 | 6                 | 0.28 |
| Year 1   | 2,163                      | 29        | 1.34 | 32        | 1.48 | 33              | 1.53 | 30                | 1.39 |
| Year 2   | 2,114                      | 88        | 4.16 | 89        | 4.21 | 89              | 4.21 | 88                | 4.16 |
| Year 3   | 2,044                      | 106       | 5.19 | 109       | 5.33 | 109             | 5.33 | 107               | 5.23 |
| Year 4   | 1,820*                     | 129       | 7.09 | 130       | 7.14 | 130             | 7.14 | 130               | 7.14 |

\* N=167 patients administratively censored due to study completion

Missing Data Pattern for Each Health Status Variable Accounting for Four Years of Follow-up

|               | DASI      |         | Energy    |         | Health Distress |         | Self Rated Health |         |
|---------------|-----------|---------|-----------|---------|-----------------|---------|-------------------|---------|
|               | Frequency | Percent | Frequency | Percent | Frequency       | Percent | Frequency         | Percent |
| Noncompliance | 79        | 3.7     | 80        | 3.7     | 80              | 3.7     | 73                | 3.4     |
| Dropout       | 305       | 14.1    | 306       | 14.2    | 306             | 14.2    | 306               | 14.2    |
| Completers    | 1779      | 82.3    | 1777      | 82.2    | 1777            | 82.2    | 1784              | 82.5    |

Table S3: Estimated randomized treatment effect on health status for patients with at least one follow-up health status measure\*

|                                                            | DASI     |        | Energy   |       | Health Distress |      | Self Rated Health |       | CES-D at year 3<br>(n=1647) |      |
|------------------------------------------------------------|----------|--------|----------|-------|-----------------|------|-------------------|-------|-----------------------------|------|
|                                                            | Estimate | P      | Estimate | P     | Estimate        | P    | Estimate          | P     | Estimate                    | P    |
| <b>Revascularization vs Medical (n=2163)</b>               | 1.32     | 0.001  | 1.36     | 0.021 | -0.47           | 0.49 | 1.77              | 0.007 | 0.41                        | 0.40 |
| <b>By intended method of revascularization</b>             |          | 0.003  |          | 0.29  |                 | 0.18 |                   | 0.42  |                             | 0.47 |
| <b>CABG Stratum: Rev vs Med (n=701)</b>                    | 2.73     | <0.001 | 1.95     | 0.069 | -1.37           | 0.23 | 2.21              | 0.060 | 0.063                       | 0.94 |
| <b>PCI Stratum: Rev vs Med (n=1462)</b>                    | 0.53     | 0.28   | 0.96     | 0.18  | 0.19            | 0.82 | 1.38              | 0.079 | 0.67                        | 0.26 |
| <b>Insulin Sensitization vs Insulin Provision (n=2163)</b> | 0.55     | 0.17   | -0.40    | 0.49  | -0.48           | 0.47 | 0.87              | 0.18  | 0.064                       | 0.90 |

\* Linear mixed models were used to analyze follow up health status scores as the outcome; the randomized treatment parameter was estimated controlling for baseline health status score, baseline angina status, missing data pattern, clinical sites as a random effect. Linear regression models were used to analyze a single follow-up CES-D score per patient by randomized treatment group.

Table S4. Multivariable regression models for health status scores during BARI 2D follow-up adjusting for follow-up angina status.

| Baseline variables                               | DASI (0-58.2) |        | Energy (0-100) |        | Health Distress (0-100) |        | Self-Rated Health (0-100) |        |
|--------------------------------------------------|---------------|--------|----------------|--------|-------------------------|--------|---------------------------|--------|
|                                                  | Estimate      | p      | Estimate       | p      | Estimate                | p      | Estimate                  | p      |
| <b>Randomization</b>                             |               |        |                |        |                         |        |                           |        |
| Revascularization versus Medical in CABG stratum | 2.43          | <0.001 | 0.99           | 0.083  | -0.17                   | 0.79   | 1.47                      | 0.020  |
| Revascularization versus Medical in PCI stratum  | 0.49          | 0.29   |                |        |                         |        |                           |        |
| Insulin sensitization versus Insulin provision   | 0.48          | 0.21   | -0.39          | 0.49   | -0.46                   | 0.48   | 0.92                      | 0.14   |
| <b>Covariates</b>                                |               |        |                |        |                         |        |                           |        |
| Baseline health status score                     | 0.52          | <0.001 | 0.43           | <0.001 | 0.41                    | <0.001 | 0.39                      | <0.001 |
| Follow up years in CABG stratum                  | -0.083        | 0.60   | -0.28          | 0.040  | -0.76                   | 0.011  | -0.26                     | 0.098  |
| Follow up years in PCI stratum                   | -0.97         | <0.001 |                |        | 0.16                    | 0.43   |                           |        |
| CABG stratum                                     | -2.42         | 0.001  | 1.44           | 0.033  | 0.018                   | 0.99   | 2.94                      | <0.001 |
| Baseline angina status (reference: no angina)    |               |        |                |        |                         |        |                           |        |
| Stable CCS1/CCS2                                 | -0.21         | 0.62   | -2.30          | <0.001 | 1.31                    | 0.078  | -1.87                     | 0.0094 |
| Stable CCS3/4 or unstable                        | -0.39         | 0.52   | -1.43          | 0.11   | 1.17                    | 0.25   | -1.10                     | 0.26   |
| Follow up angina status (reference: no angina)   |               |        |                |        |                         |        |                           |        |
| Stable CCS1/CCS2                                 | -2.08         | <0.001 | -2.69          | <0.001 | 2.47                    | <0.001 | -3.44                     | <0.001 |
| Stable CCS3/4 or unstable                        | -2.47         | <0.001 | -5.31          | <0.001 | 5.40                    | <0.001 | -5.46                     | <0.001 |
| Insulin use at entry                             | -1.72         | <0.001 | -2.25          | 0.0023 | 1.90                    | 0.025  | -2.03                     | 0.013  |
| Duration of diabetes                             | -0.082        | 0.0015 | -0.11          | 0.0037 | 0.14                    | 0.0023 | -0.15                     | <0.001 |
| Age                                              | -0.20         | <0.001 | -0.11          | 0.0030 | -0.070                  | 0.096  | -0.035                    | 0.38   |
| Male sex                                         | 2.41          | <0.001 | 2.40           | <0.001 | -2.19                   | 0.0050 | 1.71                      | 0.023  |
| Body mass index                                  | -0.17         | <0.001 | -0.17          | 0.0011 | 0.19                    | 0.0021 | -0.27                     | <0.001 |
| Current smoking                                  | -2.96         | <0.001 | -5.36          | <0.001 | 5.26                    | <0.001 | -6.97                     | <0.001 |
| History of myocardial infarction                 | 0.022         | 0.96   | -1.55          | 0.015  | 1.02                    | 0.16   | -1.27                     | 0.071  |
| History of heart failure                         | -1.97         | 0.018  | -2.82          | 0.024  | 4.13                    | 0.0038 | -3.62                     | 0.0085 |
| Neuropathy                                       | -1.37         | <0.001 | -1.43          | 0.021  | 1.31                    | 0.062  | -1.52                     | 0.026  |
| Missing status (reference: completers)           |               |        |                |        |                         |        |                           |        |
| Noncompliance                                    | -2.06         | 0.055  | -2.19          | 0.17   | 3.14                    | 0.088  | -3.62                     | 0.050  |
| Dropout                                          | -2.46         | <0.001 | -2.97          | 0.0015 | 3.97                    | <0.001 | -4.35                     | <0.001 |

Table S5: Estimated randomized treatment effect on health status for entire randomized trial based on imputation of outcome

|                                                            | <b>DASI</b> |        | <b>Energy</b> |       | <b>Health Distress</b> |      | <b>Self-rated Health</b> |       |
|------------------------------------------------------------|-------------|--------|---------------|-------|------------------------|------|--------------------------|-------|
|                                                            | Estimate    | P      | Estimate      | P     | Estimate               | P    | Estimate                 | P     |
| <b>Revascularization vs Medical (n=2368)</b>               | 1.25        | 0.002  | 1.34          | 0.037 | -0.18                  | 0.78 | 1.82                     | 0.013 |
| <b>By intended method of revascularization</b>             |             | 0.010  |               | 0.23  |                        | 0.24 |                          | 0.53  |
| <b>CABG Stratum: Rev vs Med (n=763)</b>                    | 2.59        | <0.001 | 2.08          | 0.042 | -1.12                  | 0.29 | 2.31                     | 0.062 |
| <b>PCI Stratum: Rev vs Med (n=1605)</b>                    | 0.57        | 0.22   | 0.93          | 0.22  | 0.34                   | 0.67 | 1.51                     | 0.1   |
| <b>Insulin Sensitization vs Insulin Provision (n=2368)</b> | -0.67       | 0.1    | 0.42          | 0.55  | 0.48                   | 0.48 | -0.9                     | 0.16  |

\* Linear mixed models with follow up health status as the outcome; randomized treatment parameter was estimated controlling for baseline health status score, baseline angina status, clinical sites as a random effect. Missing health status outcome data were imputed for every randomized patient in BARI 2D using multiple imputation methods.

PCI stratum

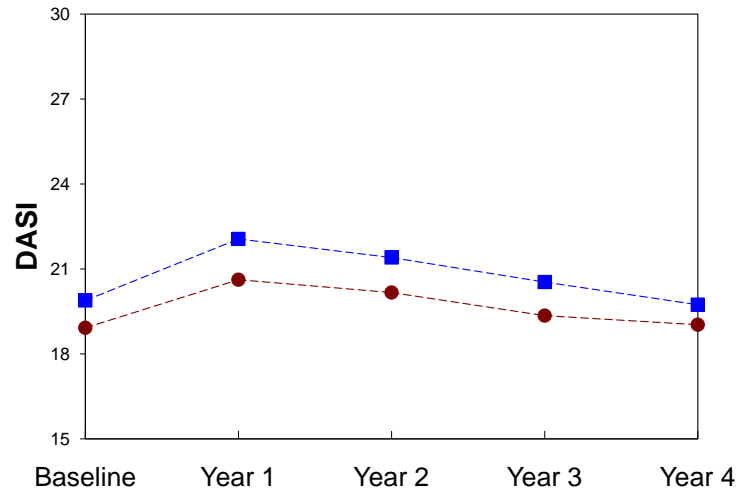

CABG stratum

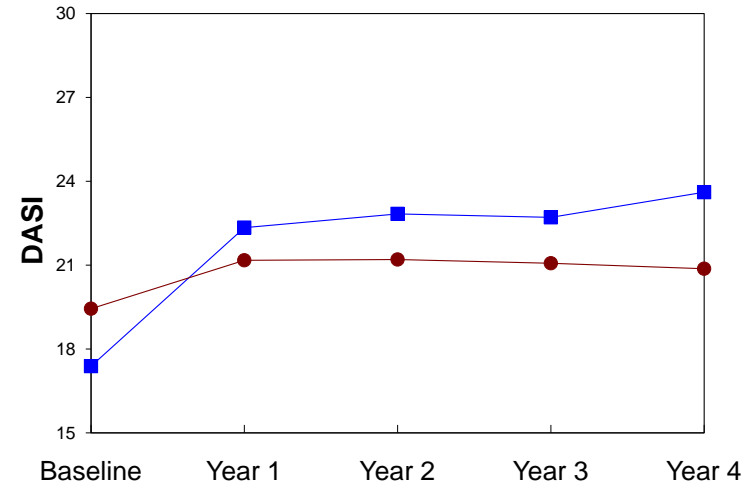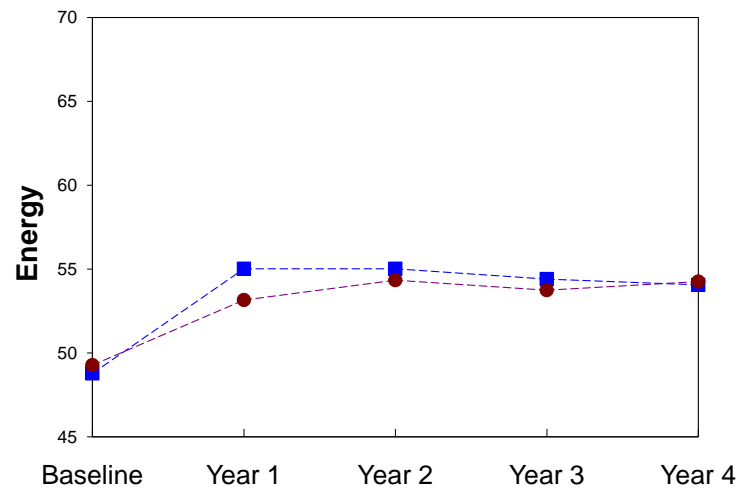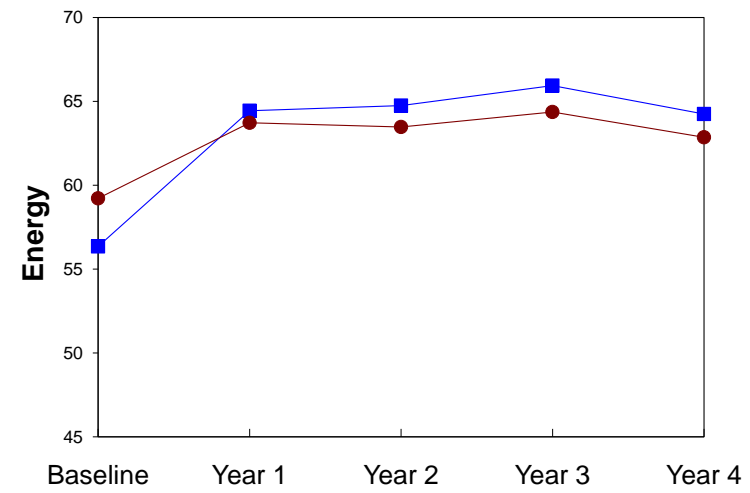

Figure S1 continue.

PCI stratum

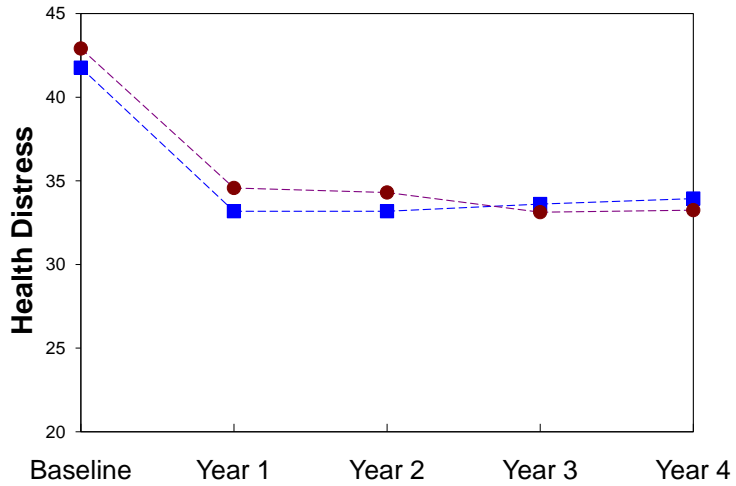

CABG stratum

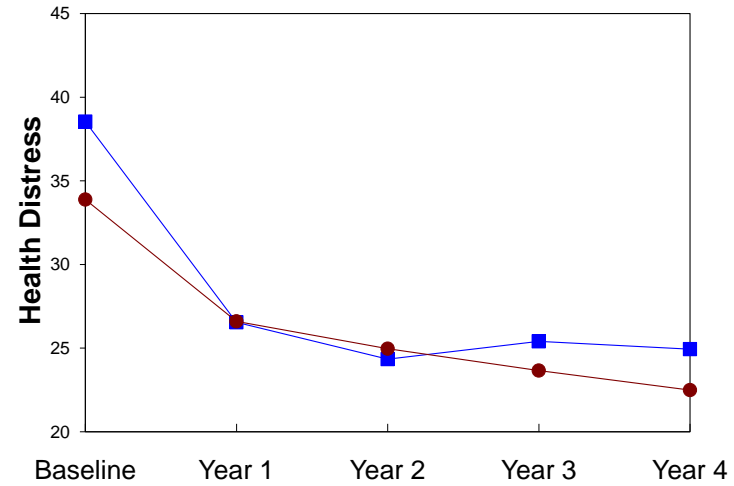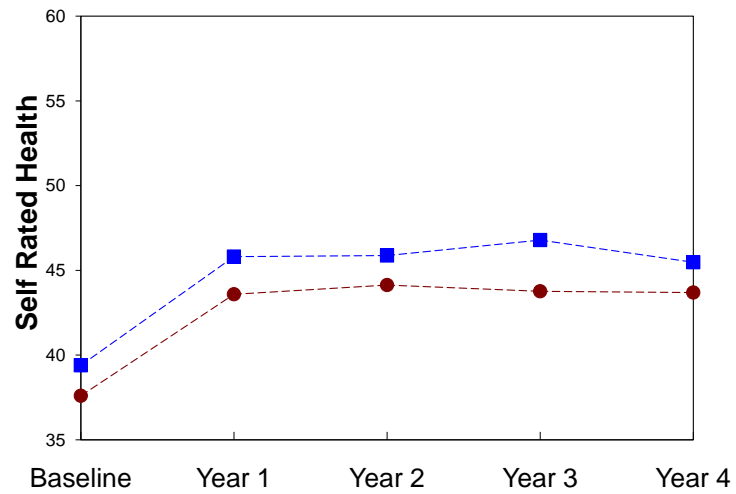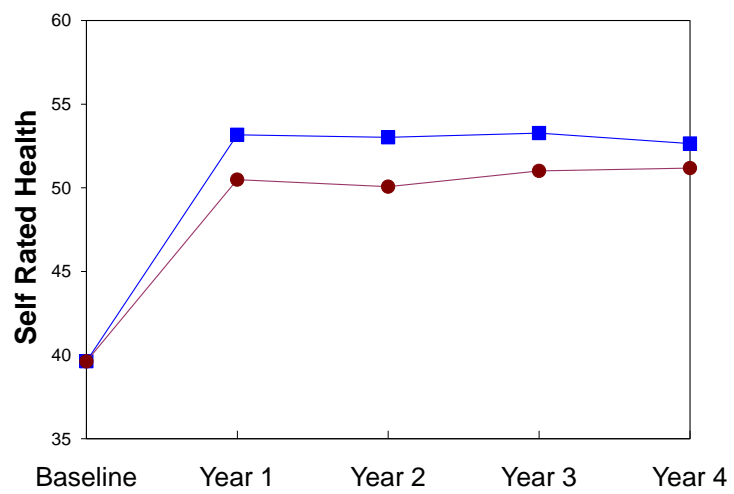

Figure S1: Health status by cardiac randomized treatment and intended method of revascularization. Prompt revascularization (solid symbol: ■ and blue line); Intensive medical therapy (solid symbols: ● and red line).
